# Supplementary material for: Design of Hierarchically Tailored Hybrids Based on Nickle Nanocrystal-Decorated Manganese Dioxides for Enhanced Fire Safety of Epoxy Resin
Source: Int J Mol Sci. 2022 Nov 8;23(22):13711. doi: 10.3390/ijms232213711 (PMC9697679; doi:10.3390/ijms232213711)
Supplement: Supplementary file 1 [file ijms-23-13711-s001.zip › ijms-2015762-supplementary.pdf]

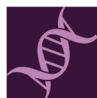

*Supporting information for*

# Design of Hierarchically Tailored Hybrids based on Nickle Nanocrystal Decorated Manganese Dioxides for Enhanced Fire Safety of Epoxy Resin

Yao Yuan <sup>1,\*</sup>, Chen Liang <sup>1</sup>, Anthony Chun Yin Yuen <sup>2</sup>, Lulu Xu <sup>3</sup>, Bin Yu <sup>4</sup>, Chengfei Cao <sup>5</sup>, and Wei Wang <sup>2,\*</sup>

<sup>1</sup> Fujian Provincial Key Laboratory of Functional Materials and Applications, School of Materials Science and Engineering, Xiamen University of Technology, Xiamen 361024, PR China

<sup>2</sup> School of Mechanical and Manufacturing Engineering, University of New South Wales, Sydney, NSW 2052, Australia

<sup>3</sup> School of Materials Science and Engineering, Nanyang Technological University, 50 Nanyang Avenue, Singapore 639798, Singapore

<sup>4</sup> State Key Laboratory of Fire Science, University of Science and Technology of China, Anhui 230026, PR China

<sup>5</sup> Centre for Future Materials, University of Southern Queensland, Springfield Central, 4300, Australia

\* Corresponding authors: Dr. Yao Yuan and Dr. Wei Wang

Fax/Tel: + 86-059-26291325

Correspondence: yuanyao@xmut.edu.cn (Yao Yuan) and wei.wang15@unsw.edu.au (Wei Wang)

---

## Additional Supporting Data

### Table captions

**Table S1** TGA results of pristine EP, EP/MnO<sub>2</sub> and EP/MnO<sub>2</sub>@CHS@SA@Ni composites under nitrogen atmosphere.

### Figure captions

**Figure S1** The synthesis process of MnO<sub>2</sub>@Chitosan@SA@Ni hybrids.

**Figure S2** XPS survey spectra of MnO<sub>2</sub> and MnO<sub>2</sub>@CHS@SA@Ni hybrids.

**Figure S3** Mn 2p spectra of MnO<sub>2</sub> and MnO<sub>2</sub>@CHS@SA@Ni hybrids.

**Figure S4** (a) FTIR spectra and (b) TGA curves of untreated MnO<sub>2</sub> and MnO<sub>2</sub>@CHS@SA@Ni hybrids.

**Figure S5** The enlarged TGA patterns of pristine EP, EP/MnO<sub>2</sub> and EP/MnO<sub>2</sub>@CHS@SA@Ni composites under nitrogen.

**Figure S6** (a) FPI and (b) FIGRA values of pristine EP, EP/MnO<sub>2</sub> and EP/MnO<sub>2</sub>@CHS@SA@Ni composites.

**Figure S7** Interior and exterior char residue analysis by using XPS technique. (a) XPS survey spectra and (b, c) elemental composition of interior and exterior char residues for pristine EP and EP/MnO<sub>2</sub>@CHS@SA@Ni 2% as determined by XPS

Table S1 TGA results of pristine EP, EP/MnO<sub>2</sub> and EP/MnO<sub>2</sub>@CHS@SA@Ni composites under nitrogen atmosphere.

| Samples                             | T <sub>-5%</sub> (°C) | T <sub>max</sub> (°C) | Residue (wt%) |
|-------------------------------------|-----------------------|-----------------------|---------------|
| EP                                  | 381                   | 395                   | 12.3          |
| EP/MnO <sub>2</sub> 2%              | 362                   | 387                   | 16.8          |
| EP/MnO <sub>2</sub> @CHS@SA@Ni 0.5% | 359                   | 383                   | 15.6          |
| EP/MnO <sub>2</sub> @CHS@SA@Ni 1%   | 355                   | 380                   | 16.4          |
| EP/MnO <sub>2</sub> @CHS@SA@Ni 2%   | 348                   | 375                   | 17.7          |

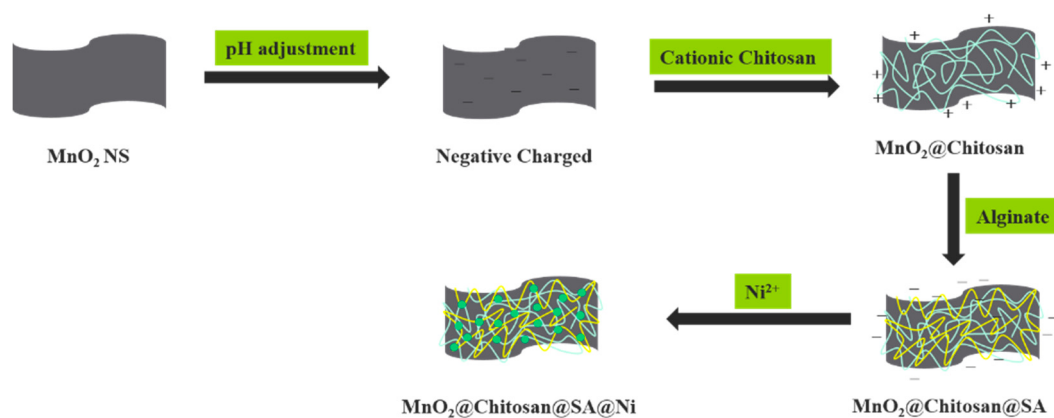

Figure S1 The synthesis process of  $\text{MnO}_2@\text{CHS}@\text{SA}@\text{Ni}$  hybrids.

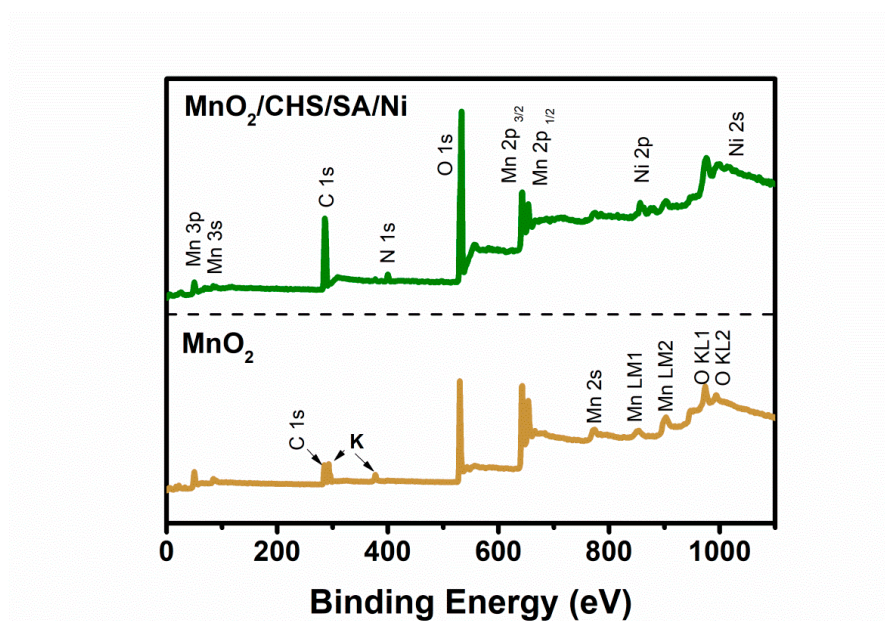

Figure S2 XPS survey spectra of  $\text{MnO}_2$  and  $\text{MnO}_2@\text{CHS}@\text{SA}@\text{Ni}$  hybrids.

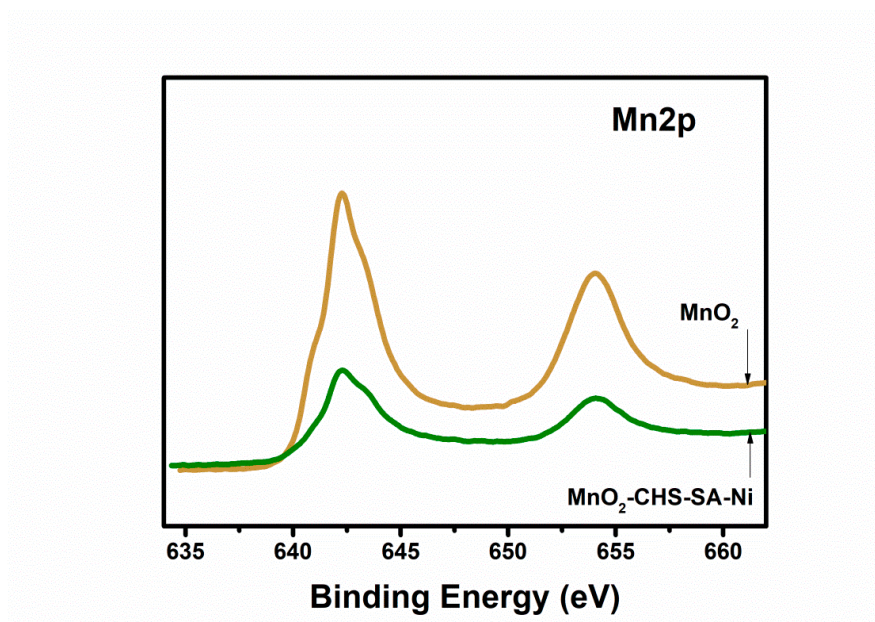

Figure S3 Mn 2p spectra of MnO<sub>2</sub> and MnO<sub>2</sub>@CHS@SA@Ni hybrids.

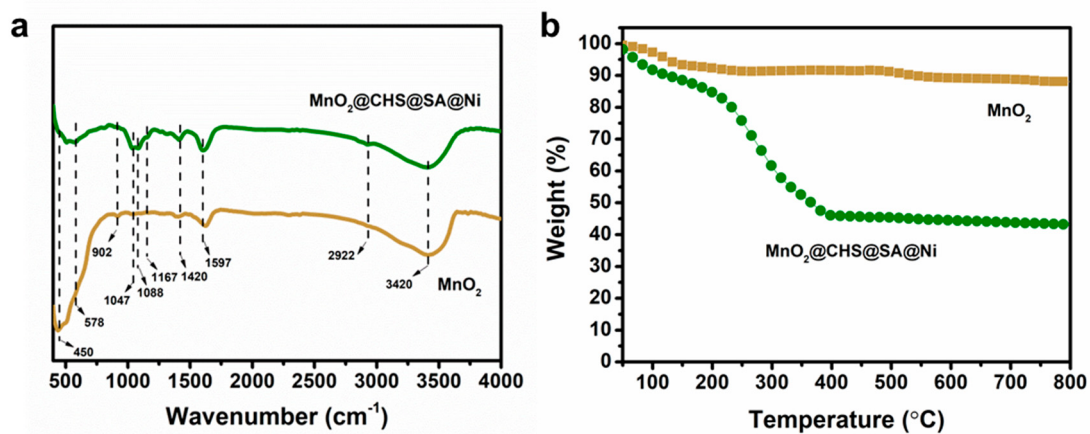

Figure S4 (a) FTIR

spectra and (b) TGA curves of untreated  $\text{MnO}_2$  and  $\text{MnO}_2@\text{CHS}@\text{SA}@\text{Ni}$  hybrids.

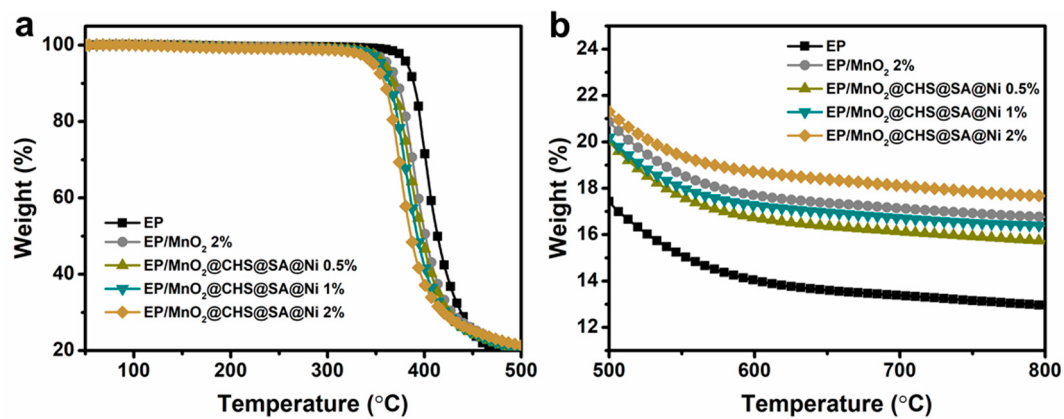

Figure S5 The enlarged TGA patterns of pristine EP, EP/MnO<sub>2</sub> and EP/ MnO<sub>2</sub>@CHS@SA@Ni composites under nitrogen atmosphere.

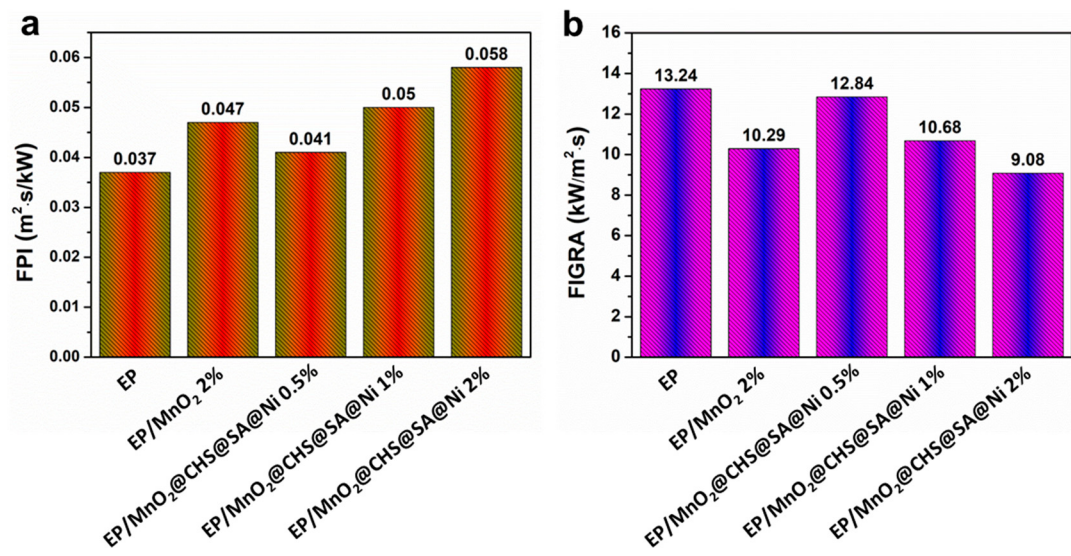

Figure S6 (a) FPI and (b) FIGRA values of pristine EP resin, EP/MnO<sub>2</sub> composites, and EP/MnO<sub>2</sub>@CHS@SA@Ni composites.

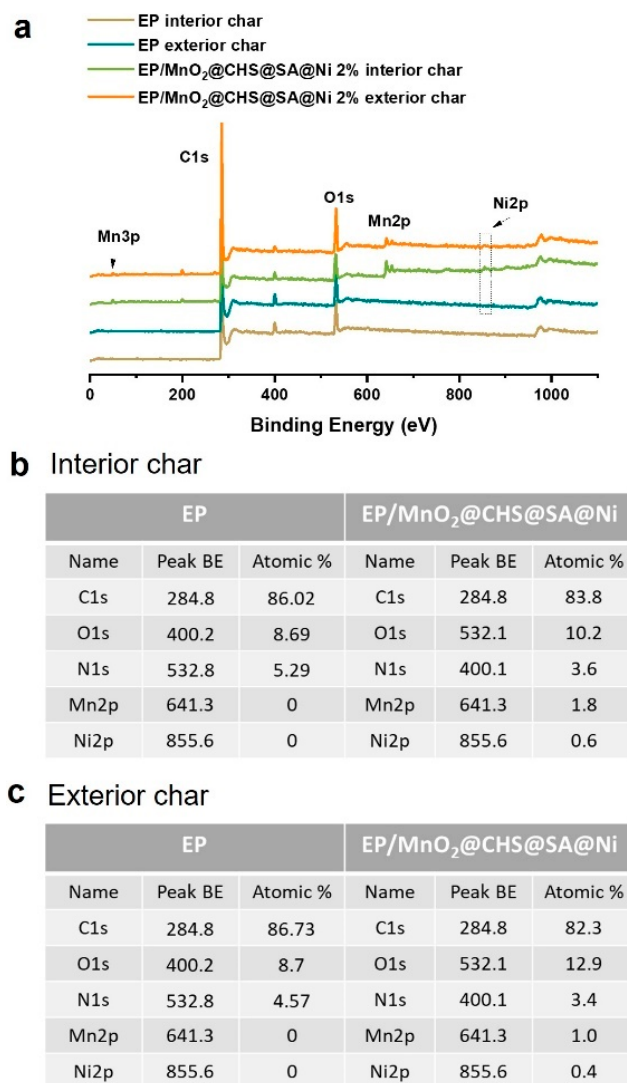

Figure S7 Interior and exterior char residue analysis by using XPS technique. (a) XPS survey spectra and (b, c) elemental composition of interior and exterior char residues for pristine EP and EP/MnO<sub>2</sub>@CHS@SA@Ni 2% as determined by XPS.
